# Supplementary material for: Defected ZnWO4-decorated WO3 nanorod arrays for efficient photoelectrochemical water splitting
Source: Royal Society of Chemistry journal article supplement (doi:10.1039/c8ra10060h), 2019-01-01
Supplement: c8ra10060h1.pdf [file c8ra10060h1.pdf]

## Supporting Information

### Defected ZnWO<sub>4</sub> decorated WO<sub>3</sub> nanorod arrays for efficient photoelectrochemical water splitting†

Ya Cui<sup>a,b</sup>, Lun Pan<sup>a,b,\*</sup>, Ying Chen<sup>a,b</sup>, Nisha Afzal<sup>a</sup>, Sana Ullah<sup>a</sup>, Danyang Liu<sup>c</sup>, Li Wang<sup>a,b</sup>, Xiangwen Zhang<sup>a,b</sup>, Ji-Jun Zou<sup>a,b</sup>

<sup>a</sup> Key Laboratory for Green Chemical Technology of the Ministry of Education, School of Chemical Engineering and Technology, Tianjin University, Tianjin 300072, China

<sup>b</sup> Collaborative Innovative Center of Chemical Science and Engineering (Tianjin), Tianjin 300072, China

<sup>c</sup> People's Public Security University of China, Beijing 100038, China.

\* Corresponding author:

Tel and fax: 86-22-27892340

E-mail address: panlun76@tju.edu.cn (L. Pan).

**Table S1.** Lattice parameter and unit cell volume for pure WO<sub>3</sub> and WO<sub>3</sub>@ZnWO<sub>4</sub> photoanodes.

|                            |                   | Lattice parameters |       |       |       |       |       | Cell volume<br>(Å <sup>3</sup> ) |
|----------------------------|-------------------|--------------------|-------|-------|-------|-------|-------|----------------------------------|
|                            |                   | a (Å)              | b (Å) | c (Å) | α     | β     | γ     |                                  |
|                            | WO <sub>3</sub>   | 7.298              | 7.532 | 7.683 | 90.00 | 90.00 | 90.00 | 422.4                            |
| WZ-1                       | WO <sub>3</sub>   | 7.298              | 7.532 | 7.683 | 90.00 | 90.00 | 90.00 | 422.4                            |
|                            | ZnWO <sub>4</sub> | 4.686              | 5.713 | 4.931 | 90.00 | 90.60 | 90.00 | 132.0                            |
| WZ-2                       | WO <sub>3</sub>   | 7.298              | 7.532 | 7.683 | 90.00 | 90.00 | 90.00 | 422.4                            |
|                            | ZnWO <sub>4</sub> | 4.686              | 5.691 | 4.943 | 90.00 | 90.40 | 90.00 | 131.8                            |
| WZ-3                       | WO <sub>3</sub>   | 7.298              | 7.532 | 7.683 | 90.00 | 90.00 | 90.00 | 422.4                            |
|                            | ZnWO <sub>4</sub> | 4.686              | 5.689 | 4.954 | 90.00 | 90.50 | 90.00 | 132.1                            |
| Standard WO <sub>3</sub>   |                   |                    |       |       |       |       |       |                                  |
|                            | JCPDS No. 43-1035 | 7.297              | 7.539 | 7.688 | 90.00 | 90.91 | 90.00 | 422.9                            |
| Standard ZnWO <sub>4</sub> |                   |                    |       |       |       |       |       |                                  |
|                            | JCPDS No. 15-0774 | 4.691              | 5.720 | 4.925 | 90.00 | 90.64 | 90.00 | 132.1                            |

**Table S2.** Comparison of different WO<sub>3</sub> based photoanodes system used for solar water splitting recently.

| Photoanode material                                             | Current density         | preparation method                                        | Morphology                                                         | References       |
|-----------------------------------------------------------------|-------------------------|-----------------------------------------------------------|--------------------------------------------------------------------|------------------|
| WO <sub>3</sub> nanorods /BiOI core/shell structure             | 0.79 mA/cm <sup>2</sup> | hydrothermal and ionic layer adsorption reaction process. | WO <sub>3</sub> nanorods/BiOI nanospheres                          | S1               |
| WO <sub>3</sub> @ZnWO <sub>4</sub> @ZnO-ZnO                     | 1.57 mA/cm <sup>2</sup> | atomic layer deposition and hydrothermal process          | nanosheets                                                         | S2               |
| WO <sub>3</sub> /BiVO <sub>4</sub> heterojunction               | 0.8 mA/cm <sup>2</sup>  | solvothelmal deposition; spincoating                      | nanorod-array films                                                | S3               |
| WO <sub>3</sub> /TiO <sub>2</sub> photoanode                    | 1.17 mA/cm <sup>2</sup> | chemical bath deposition                                  | WO <sub>3</sub> nanoplates/TiO <sub>2</sub> nanoprickle overlayers | S4               |
| WO <sub>3</sub> /g-C <sub>3</sub> N <sub>4</sub> heterojunction | 0.73 mA/cm <sup>2</sup> | hydrothermal growth and deposition-annealing process      | nanosheet arrays                                                   | S5               |
| WO <sub>3</sub> @defected ZnWO <sub>4</sub>                     | 1.87 mA/cm <sup>2</sup> | solvothelmal method                                       | nanorod arrays                                                     | <b>This work</b> |

**Table S3.** Fitted values of  $R_s$ ,  $R_{ct}$  for pure WO<sub>3</sub> and WO<sub>3</sub>@ZnWO<sub>4</sub> under dark and AM 1.5 G simulated sunlight irradiation.

| Device                | $R_s$ ( $\Omega$ ) | $R_{ct}$ ( $\Omega$ ) |
|-----------------------|--------------------|-----------------------|
| WO <sub>3</sub>       | 35.88              | 31347                 |
| WZ-1                  | 34.47              | 33858                 |
| WZ-2                  | 31.62              | 34638                 |
| WZ-3                  | 27.86              | 35552                 |
| WO <sub>3</sub> light | 25.88              | 592                   |
| WZ-1 light            | 23.5               | 422.4                 |
| WZ-2 light            | 32.62              | 391.3                 |
| WZ-3 light            | 24.28              | 488.5                 |

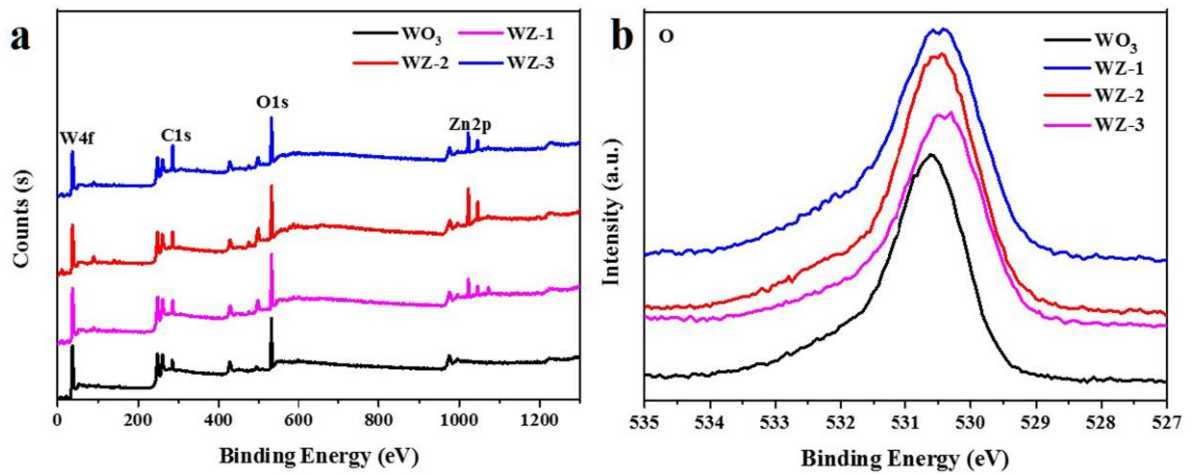

**Fig. S1.** The XPS spectra of WO<sub>3</sub> and WZ-x. (a) Survey spectra and (b) O 1s spectra.

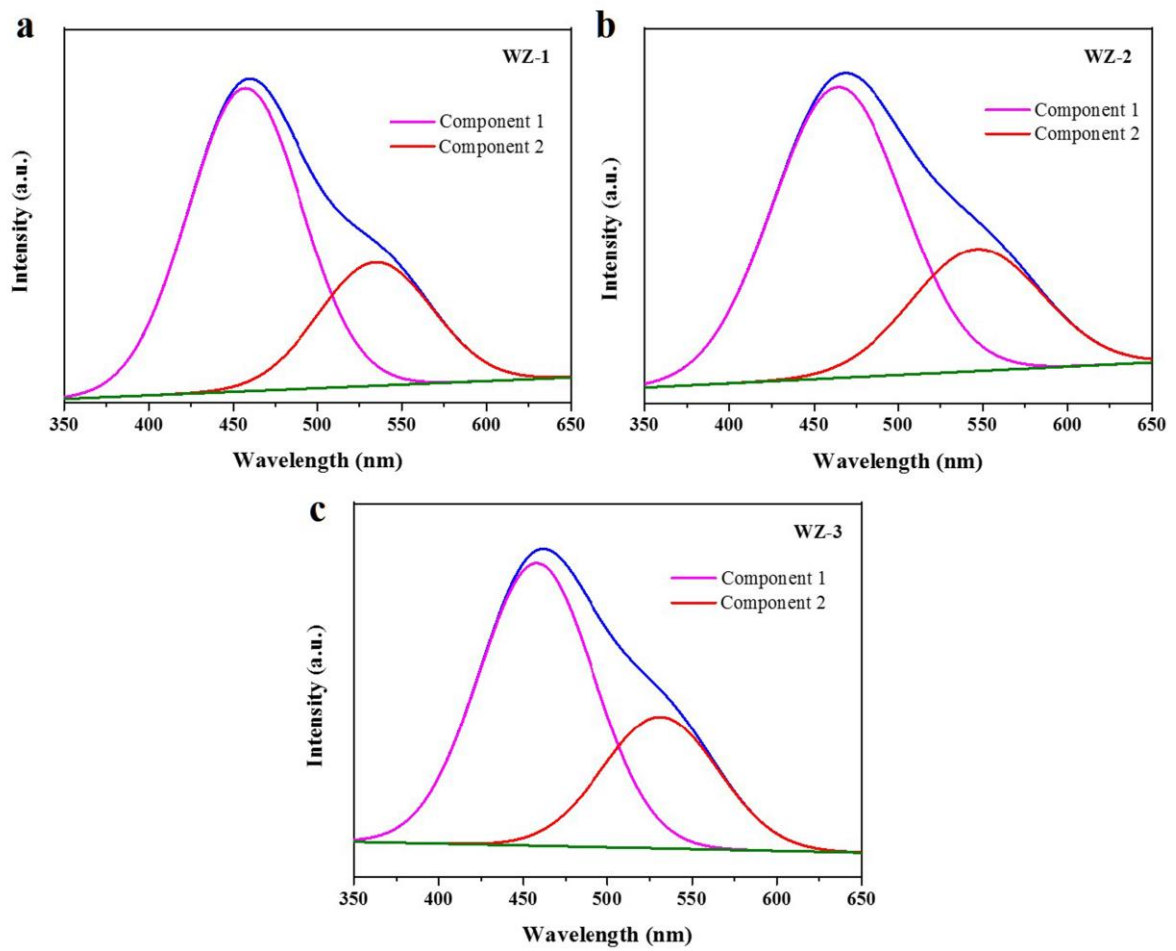

**Fig. S2.** Individual component, 1 (high intensity) and 2 (low intensity), of PL spectrum of WZ-x.

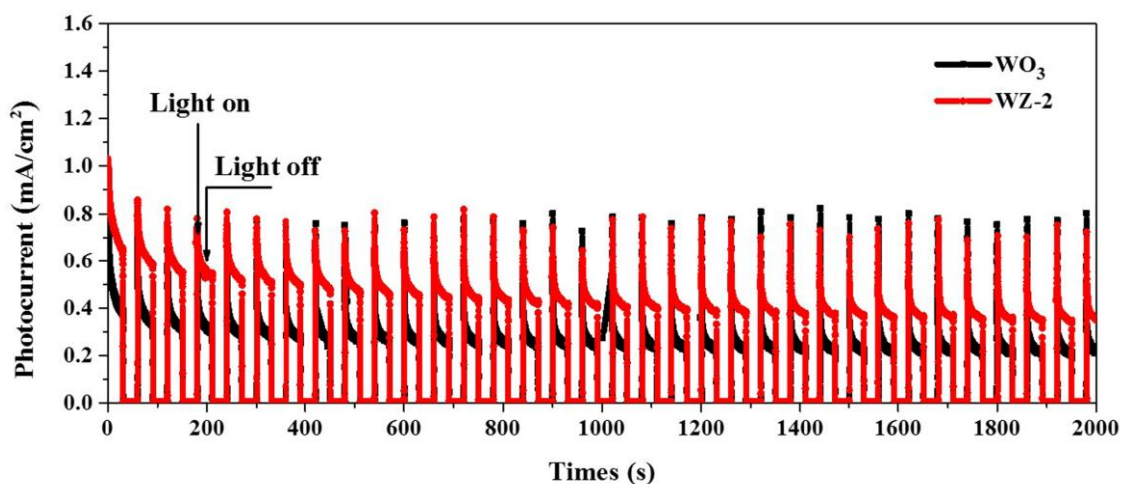

**Fig. S3.** PEC stability of WZ-2 under AM 1.5 G simulated sunlight irradiation at 0.4 V (vs. Ag/AgCl) via a 2000s continuous PEC water splitting experiment (60 s on-off cycle).

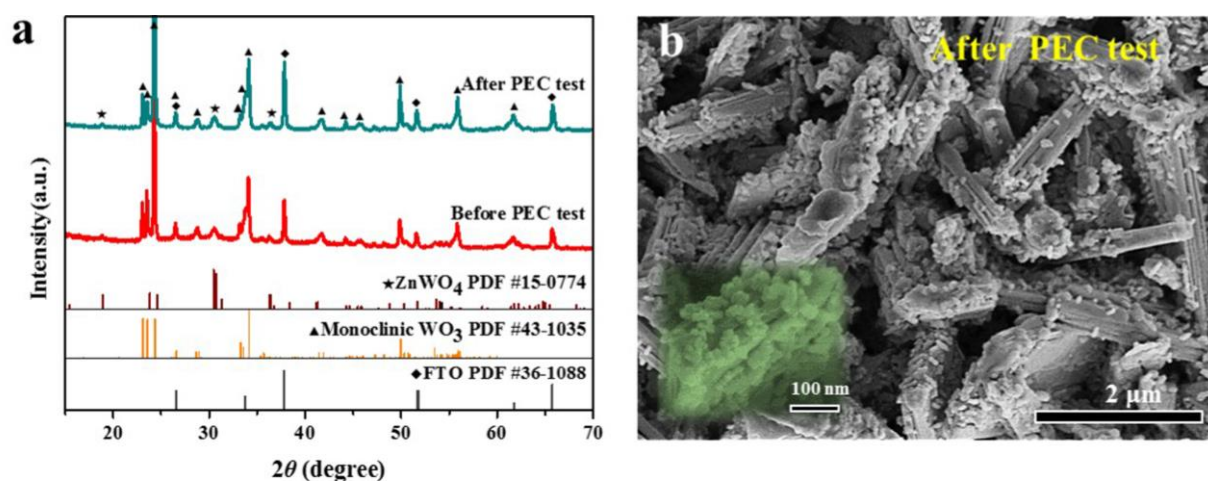

**Fig. S4.** (a) XRD patterns and (b) SEM images of WZ-2 before and after PEC water splitting reaction.

#### References:

- S1. H. Ma, J. Zhang and Z. Liu, *Appl. Surf. Sci.*, 2017, **423**, 63-70.
- S2. K. Yuan, Q. Cao, X. Li, H.-Y. Chen, Y. Deng, Y.-Y. Wang, W. Luo, H.-L. Lu and D. W. Zhang, *Nano Energy*, 2017, **41**, 543-551.
- S3. J. Su, L. Guo, N. Bao and C. A. Grimes, *Nano Lett.*, 2011, **11**, 1928-1933.
- S4. Q. Zeng, J. Bai, J. Li, B. Zhou and Y. Sun, *Nano Energy*, 2017, **41**, 225-232.
- S5. Y. Li, X. Wei, X. Yan, J. Cai, A. Zhou, M. Yang and K. Liu, *Phys. Chem. Chem. Phys.*, 2016, **18**, 10255.
